# Supplementary material
Source: MDPI journal article supplement (https://www.mdpi.com/2311-7524/9/5/575)

Posterior membership probability

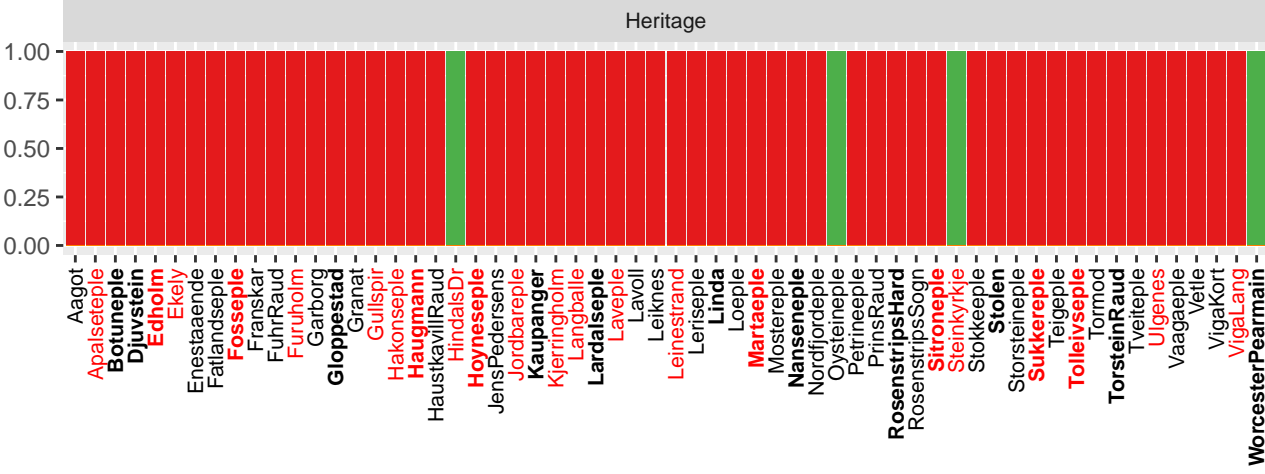

Posterior membership probability

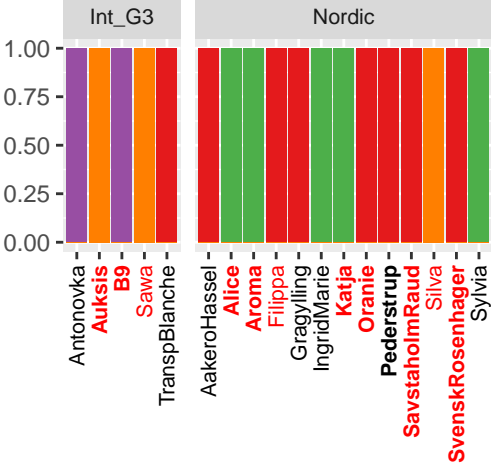

Posterior membership probability

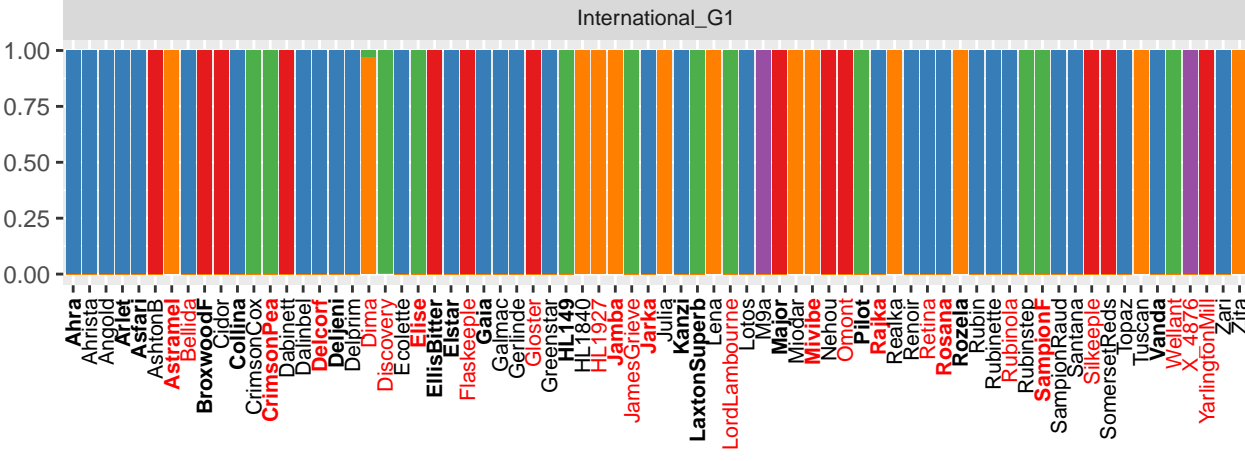

Posterior membership probability

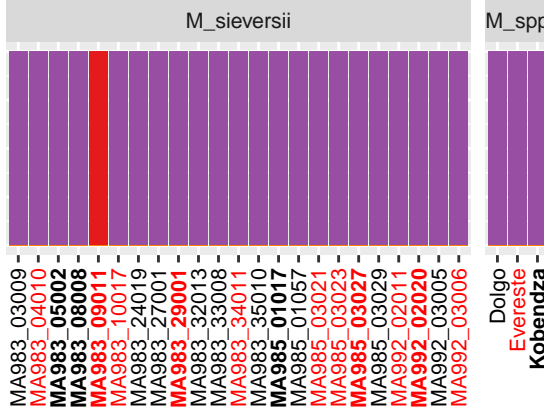

Posterior membership probability

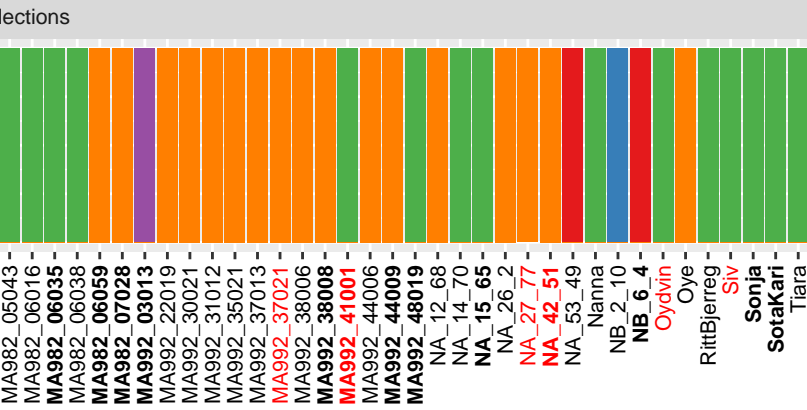

Posterior membership probability

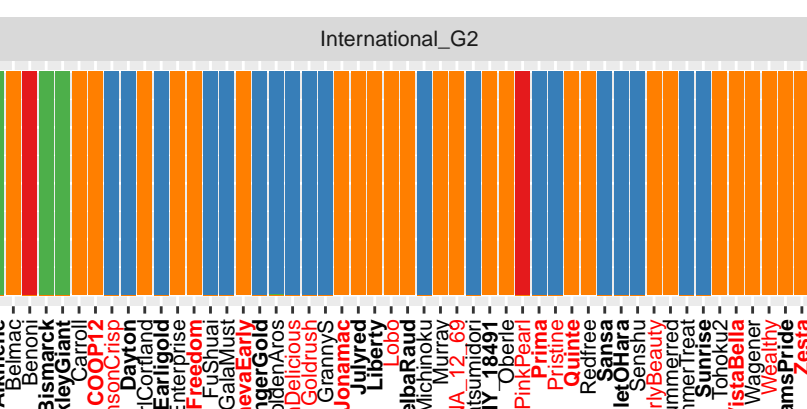

Inferred genetic clusters

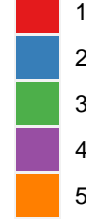

Supplement: s1 [file s1]
