# Supplementary material
Source: MDPI journal article supplement (https://www.mdpi.com/2311-7524/9/5/575)

Allele contribution to axis 1

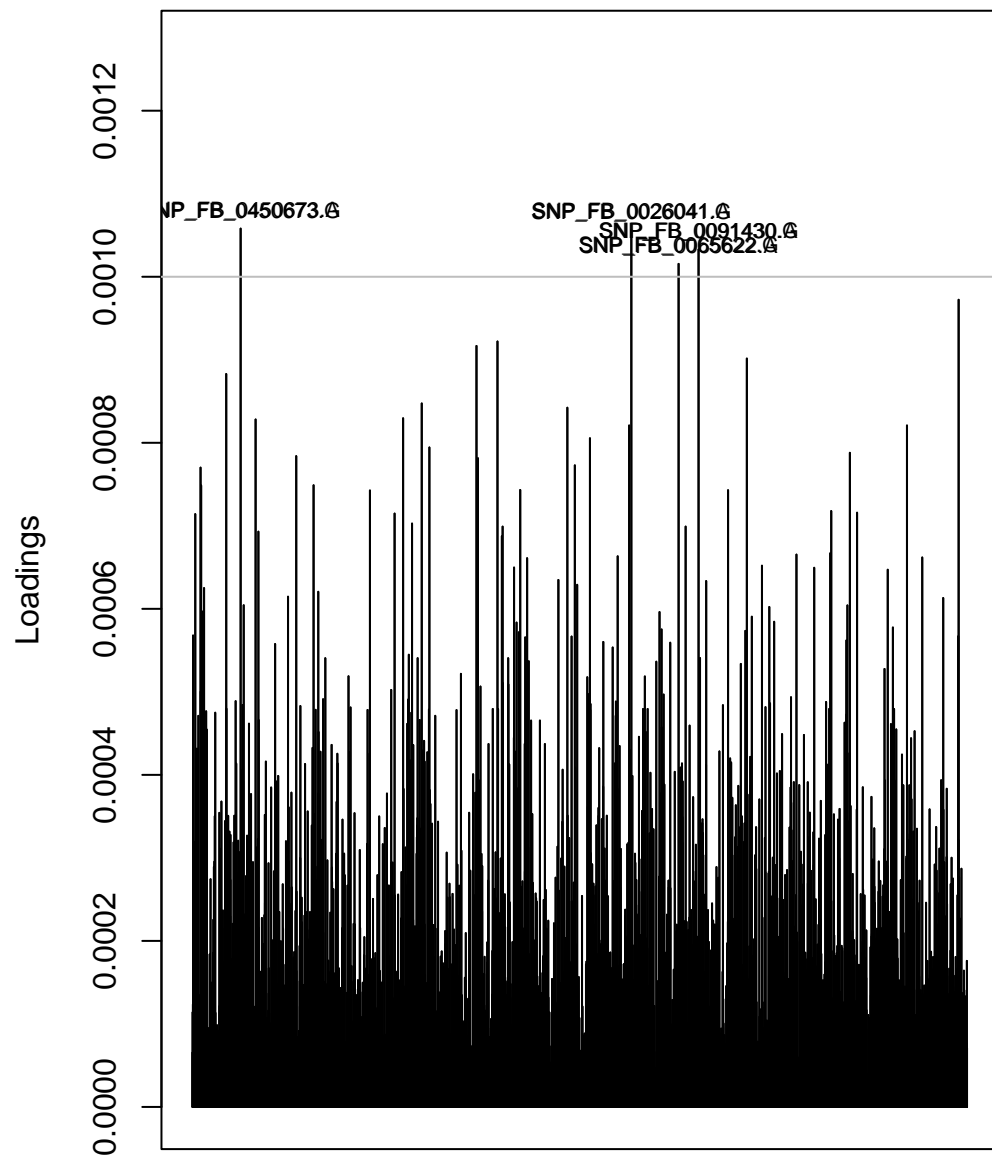

Allele contribution to axis 2

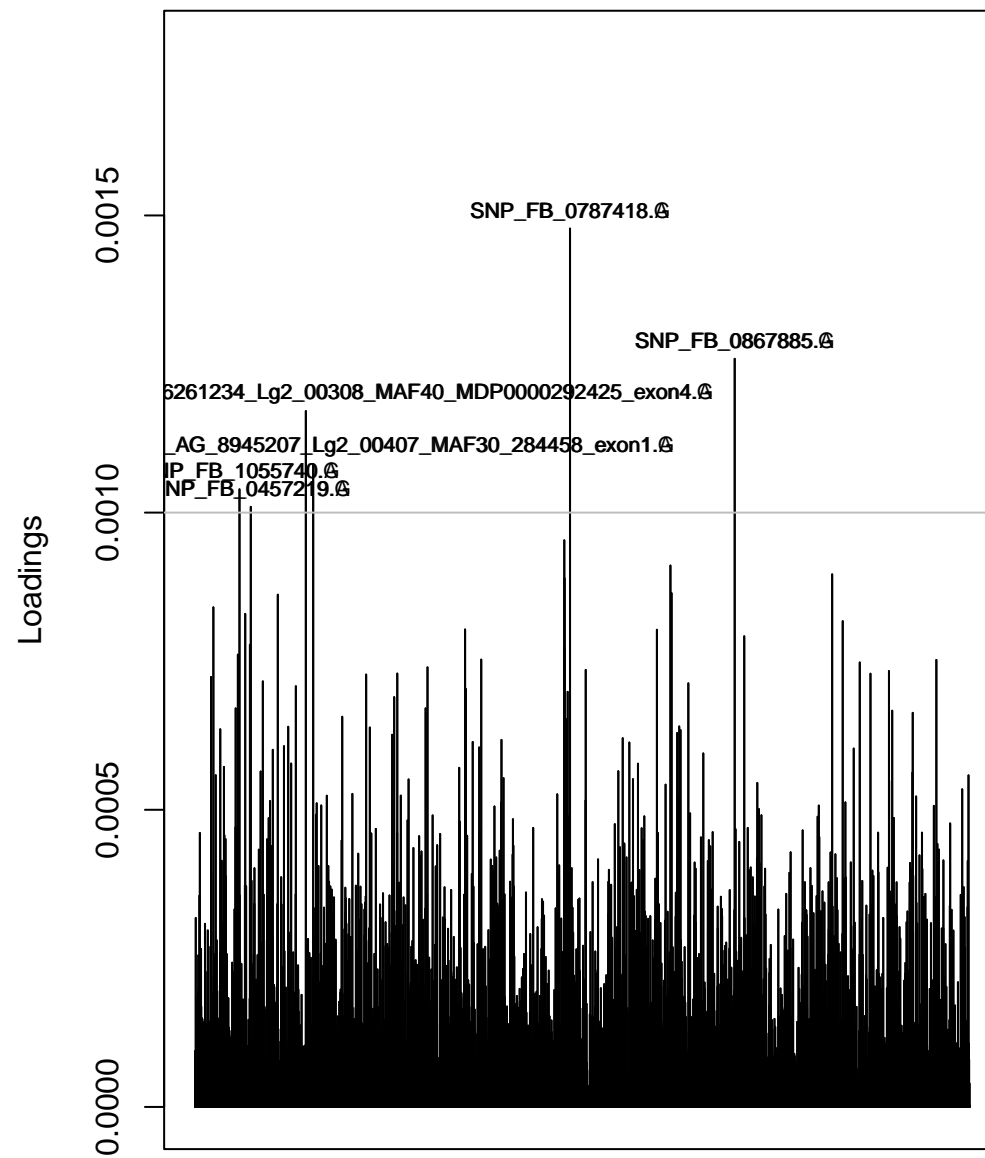

Supplement: s1 [file s1]
